# Supplementary material
Source: MDPI journal article supplement (https://www.mdpi.com/1999-4907/15/5/799)
Supplement: s1 [file s1]

**Table S1.** Correlations between 25 environmental variables in Jeju Island. The correlation coefficients were obtained by Pearson correlation analysis. The statistical significance of the coefficients was tested by t-test, and almost all coefficients were significant at the 0.05 level, but some non-significant coefficients are italicized.

|     | B01    | B02    | B03    | B04    | B05    | B06    | B07    | B08    | B09    | B10    | B11    | B12    | B13    | B14    | B15    | B16    | B17    | B18    | B19    | L01    | L02    | L03    | L04    | L05    | L06   |
|-----|--------|--------|--------|--------|--------|--------|--------|--------|--------|--------|--------|--------|--------|--------|--------|--------|--------|--------|--------|--------|--------|--------|--------|--------|-------|
| B01 | 1.000  |        |        |        |        |        |        |        |        |        |        |        |        |        |        |        |        |        |        |        |        |        |        |        |       |
| B02 | 0.435  | 1.000  |        |        |        |        |        |        |        |        |        |        |        |        |        |        |        |        |        |        |        |        |        |        |       |
| B03 | 0.646  | 0.900  | 1.000  |        |        |        |        |        |        |        |        |        |        |        |        |        |        |        |        |        |        |        |        |        |       |
| B04 | -0.502 | 0.205  | -0.213 | 1.000  |        |        |        |        |        |        |        |        |        |        |        |        |        |        |        |        |        |        |        |        |       |
| B05 | 0.994  | 0.486  | 0.661  | -0.414 | 1.000  |        |        |        |        |        |        |        |        |        |        |        |        |        |        |        |        |        |        |        |       |
| B06 | 0.986  | 0.298  | 0.556  | -0.604 | 0.969  | 1.000  |        |        |        |        |        |        |        |        |        |        |        |        |        |        |        |        |        |        |       |
| B07 | -0.139 | 0.673  | 0.307  | 0.842  | -0.049 | -0.294 | 1.000  |        |        |        |        |        |        |        |        |        |        |        |        |        |        |        |        |        |       |
| B08 | 0.994  | 0.483  | 0.656  | -0.407 | 0.999  | 0.967  | -0.046 | 1.000  |        |        |        |        |        |        |        |        |        |        |        |        |        |        |        |        |       |
| B09 | 0.994  | 0.372  | 0.620  | -0.587 | 0.979  | 0.996  | -0.237 | 0.978  | 1.000  |        |        |        |        |        |        |        |        |        |        |        |        |        |        |        |       |
| B10 | 0.996  | 0.471  | 0.651  | -0.428 | 0.999  | 0.972  | -0.066 | 0.999  | 0.982  | 1.000  |        |        |        |        |        |        |        |        |        |        |        |        |        |        |       |
| B11 | 0.995  | 0.380  | 0.626  | -0.583 | 0.980  | 0.995  | -0.229 | 0.979  | 1.000  | 0.983  | 1.000  |        |        |        |        |        |        |        |        |        |        |        |        |        |       |
| B12 | -0.863 | -0.287 | -0.457 | 0.372  | -0.873 | -0.871 | 0.144  | -0.867 | -0.862 | -0.865 | -0.859 | 1.000  |        |        |        |        |        |        |        |        |        |        |        |        |       |
| B13 | -0.941 | -0.367 | -0.526 | 0.362  | -0.952 | -0.933 | 0.086  | -0.950 | -0.930 | -0.949 | -0.929 | 0.961  | 1.000  |        |        |        |        |        |        |        |        |        |        |        |       |
| B14 | -0.747 | -0.122 | -0.446 | 0.775  | -0.700 | -0.791 | 0.490  | -0.694 | -0.790 | -0.704 | -0.788 | 0.677  | 0.649  | 1.000  |        |        |        |        |        |        |        |        |        |        |       |
| B15 | -0.686 | -0.375 | -0.368 | -0.031 | -0.724 | -0.643 | -0.201 | -0.729 | -0.642 | -0.723 | -0.643 | 0.659  | 0.785  | 0.152  | 1.000  |        |        |        |        |        |        |        |        |        |       |
| B16 | -0.887 | -0.307 | -0.479 | 0.380  | -0.897 | -0.892 | 0.138  | -0.891 | -0.885 | -0.891 | -0.883 | 0.996  | 0.978  | 0.669  | 0.706  | 1.000  |        |        |        |        |        |        |        |        |       |
| B17 | -0.680 | -0.064 | -0.379 | 0.739  | -0.638 | -0.735 | 0.505  | -0.628 | -0.729 | -0.637 | -0.725 | 0.747  | 0.649  | 0.936  | 0.104  | 0.724  | 1.000  |        |        |        |        |        |        |        |       |
| B18 | -0.798 | -0.216 | -0.427 | 0.472  | -0.795 | -0.823 | 0.254  | -0.785 | -0.814 | -0.787 | -0.810 | 0.973  | 0.895  | 0.721  | 0.531  | 0.963  | 0.830  | 1.000  |        |        |        |        |        |        |       |
| B19 | -0.678 | -0.067 | -0.360 | 0.678  | -0.645 | -0.732 | 0.466  | -0.634 | -0.723 | -0.641 | -0.718 | 0.803  | 0.687  | 0.900  | 0.157  | 0.776  | 0.987  | 0.884  | 1.000  |        |        |        |        |        |       |
| L01 | 0.456  | 0.010  | 0.189  | -0.382 | 0.442  | 0.499  | -0.307 | 0.438  | 0.475  | 0.439  | 0.473  | -0.392 | -0.392 | -0.472 | -0.175 | -0.386 | -0.425 | -0.370 | -0.421 | 1.000  |        |        |        |        |       |
| L02 | 0.405  | 0.490  | 0.440  | 0.108  | 0.443  | 0.342  | 0.331  | 0.439  | 0.369  | 0.433  | 0.370  | -0.426 | -0.468 | -0.008 | -0.542 | -0.445 | -0.039 | -0.358 | -0.080 | -0.118 | 1.000  |        |        |        |       |
| L03 | -0.289 | -0.104 | -0.123 | 0.088  | -0.288 | -0.272 | -0.014 | -0.293 | -0.277 | -0.293 | -0.278 | 0.258  | 0.282  | 0.219  | 0.193  | 0.264  | 0.204  | 0.240  | 0.205  | -0.026 | -0.110 | 1.000  |        |        |       |
| L04 | 0.396  | 0.060  | 0.256  | -0.440 | 0.367  | 0.423  | -0.292 | 0.365  | 0.417  | 0.370  | 0.417  | -0.248 | -0.280 | -0.548 | -0.067 | -0.257 | -0.439 | -0.255 | -0.401 | 0.287  | -0.326 | -0.032 | 1.000  |        |       |
| L05 | -0.740 | -0.447 | -0.598 | 0.326  | -0.749 | -0.723 | 0.026  | -0.742 | -0.732 | -0.741 | -0.732 | 0.645  | 0.698  | 0.509  | 0.553  | 0.663  | 0.452  | 0.585  | 0.461  | -0.487 | -0.594 | -0.029 | -0.452 | 1.000  |       |
| L06 | 0.059  | 0.016  | 0.040  | -0.043 | 0.057  | 0.062  | -0.029 | 0.057  | 0.061  | 0.058  | 0.061  | -0.075 | -0.074 | -0.030 | -0.075 | -0.077 | -0.046 | -0.072 | -0.049 | 0.047  | 0.065  | 0.011  | -0.063 | -0.074 | 1.000 |

B01: annual mean temperature, B02: mean diurnal range, B03: Isothermality, B04: temperature seasonality, B05: max temperature of warmest month, B06: min temperature of coldest month, B07: temperature annual range, B08: mean temperature of wettest quarter, B09: mean temperature of driest quarter, B10: mean temperature of warmest quarter, B11: mean temperature of coldest quarter, B12: annual precipitation, B13: precipitation of wettest month, B14: precipitation of driest month, B15: precipitation seasonality, B16: precipitation of wettest quarter, B17: precipitation of driest quarter, B18: precipitation of warmest quarter, B19: precipitation of coldest quarter, L01: density of barren land, L02: density of artificial grassland, L03: density of natural grassland, L04: density of artificial forest, L05: density of natural forest, L06: density of aquatic area

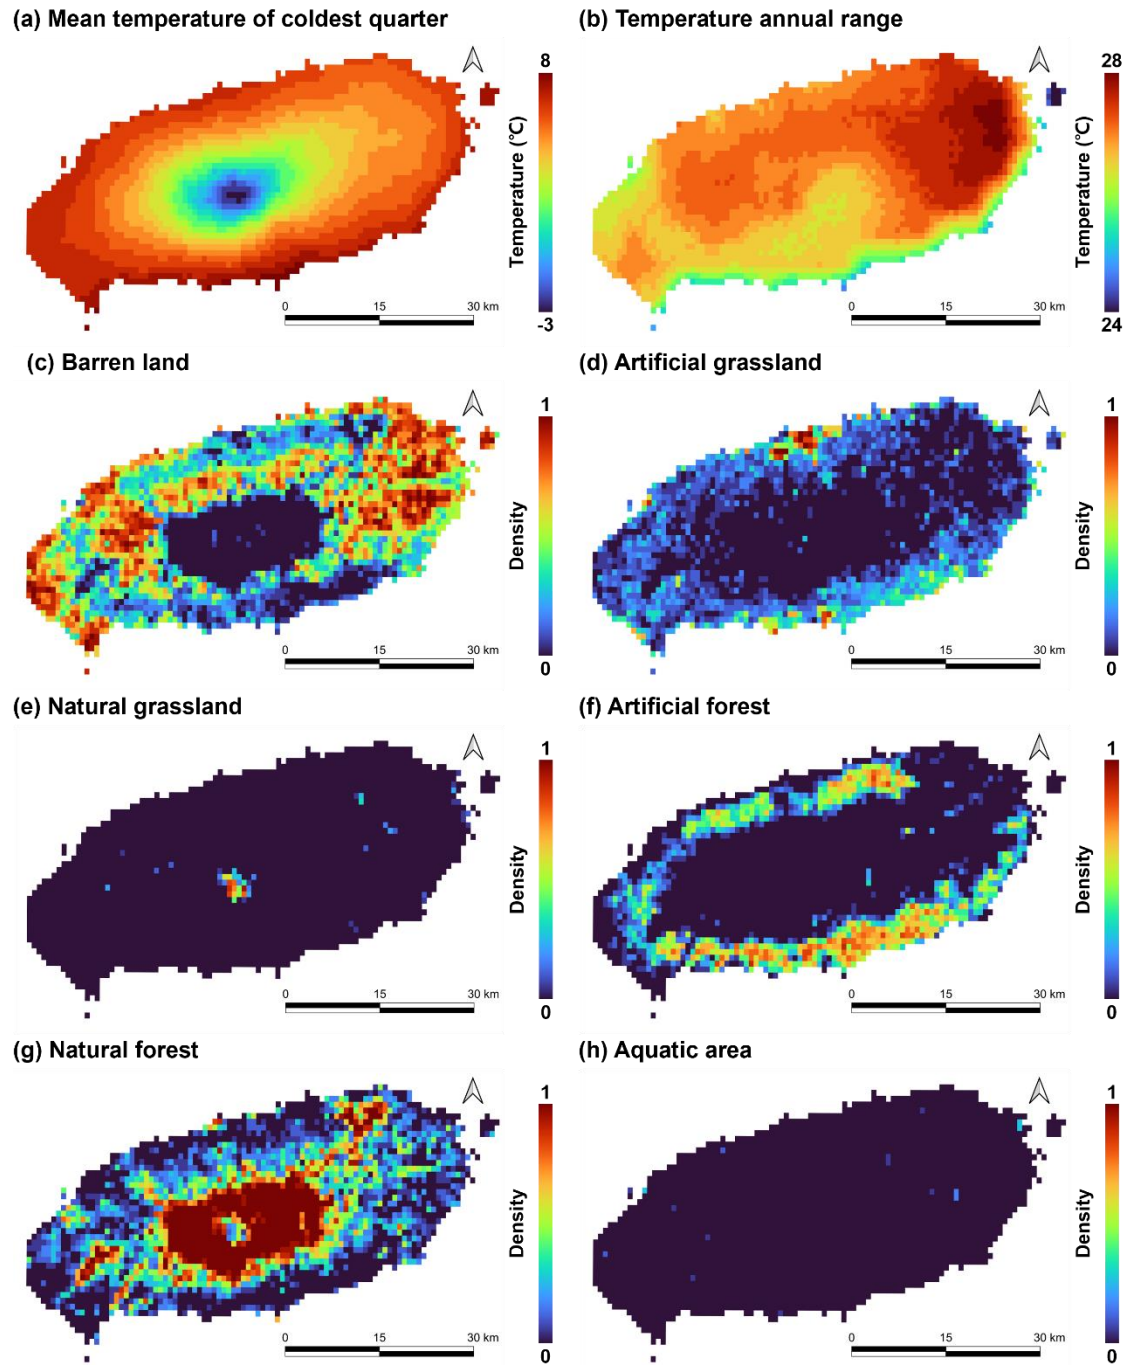

**Figure S1.** Diversity in environmental factors used in species distribution model for *Taxillus yadoriki* in Jeju Island.
